# Supplementary material
Source: Springer Nature journal article supplement (https://www.springermedizin.de/resource/supplementary/12889_2008_1660_MOESM2_ESM.pdf/9503668)

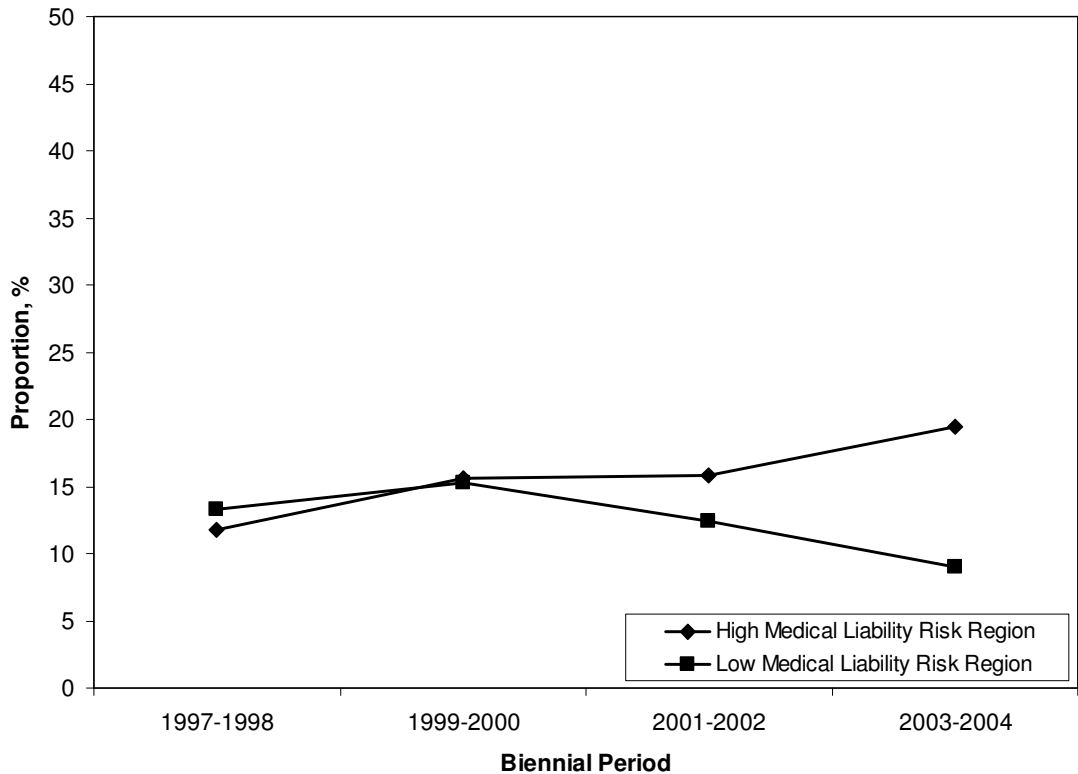

No. of Visits  
(thousands)

62100

46900

44100

57900

Supplement: MOESM2 [file 9503668]
